# Supplementary material for: Tuning the electronic properties of cyclopentadienyl analogs with CB2N2 frameworks: 1,2-diphenyl-1,2-diaza-3,5-diborolyl ligands and their alkali metal salts
Source: Royal Society of Chemistry journal article supplement (doi:10.1039/b802930j), 2008-01-01

**Tuning the electronic properties of cyclopentadienyl analogs with CB<sub>2</sub>N<sub>2</sub>  
frameworks: 1,2-diphenyl-1,2-diaza-3,5-diborolyl ligands and their alkali  
metal salts**

*Hanh V. Ly, Jari Konu, Masood Parvez and Roland Roesler\**

Department of Chemistry, University of Calgary, 2500 University Drive, Calgary, Alberta,  
T2N 1N4 Canada

*- Supporting Information -*

<sup>1</sup>H, <sup>7</sup>Li, <sup>11</sup>B and <sup>13</sup>C NMR spectra of derivatives **1**, **2**, **3a**, **3b** and **3c**.

$^1\text{H}$  and  $^{11}\text{B}$  NMR Spectra of 1,2,3,5-Tetraphenyl-1,2-diaza-3,5-diborolidine (**1**)

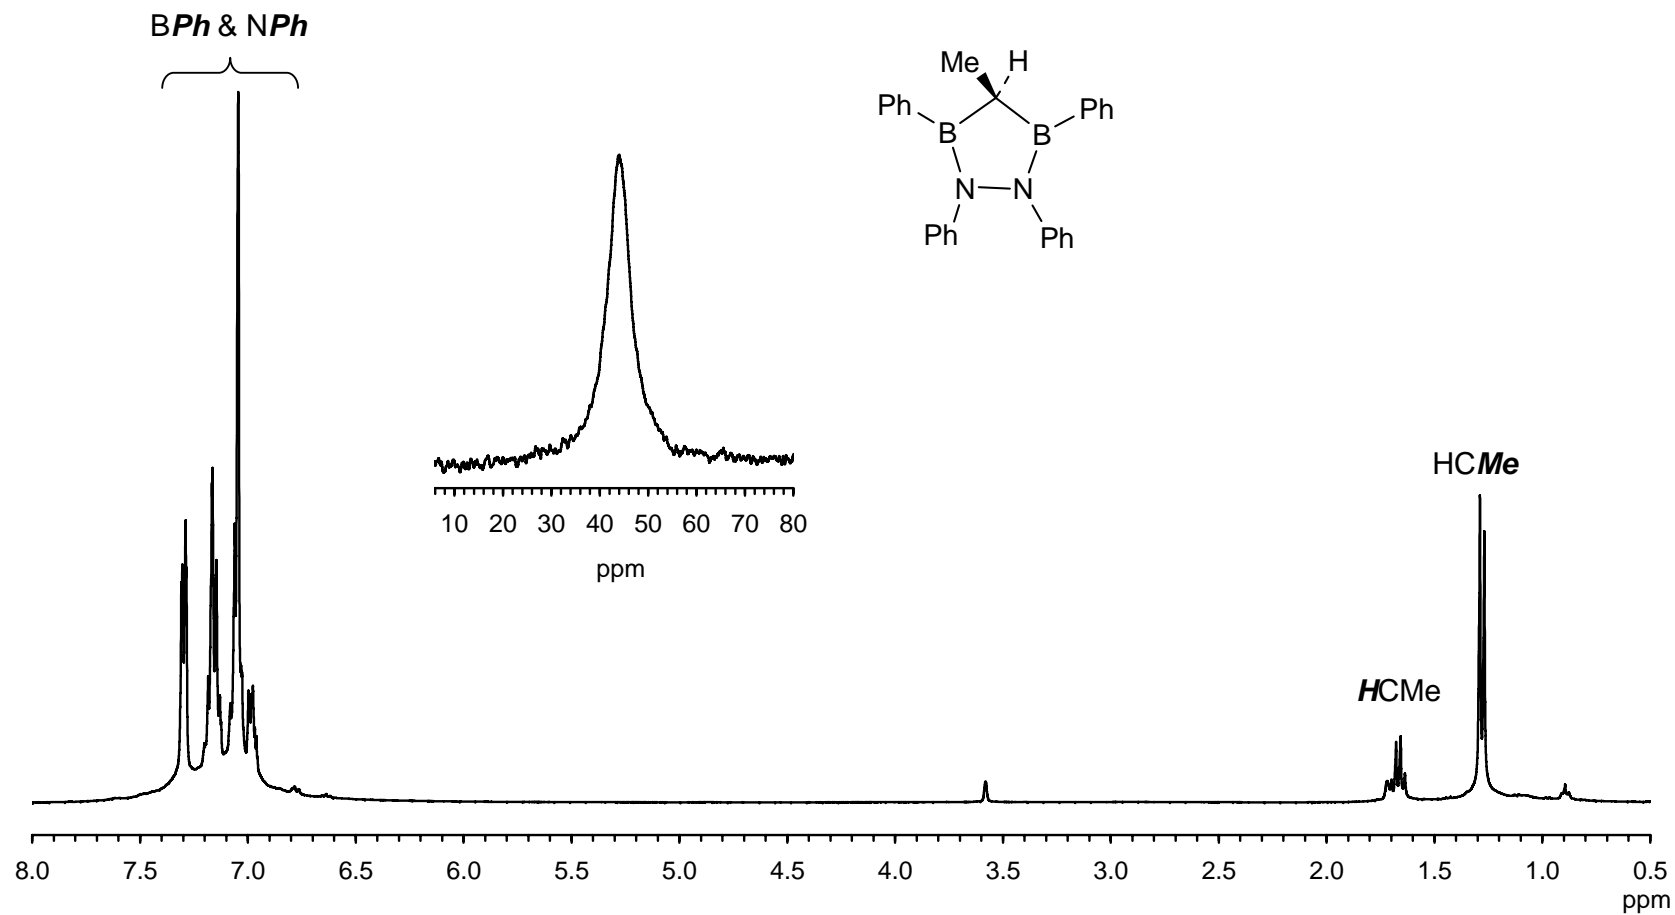

$^{13}\text{C}$  NMR Spectrum of 1,2,3,5-Tetraphenyl-1,2-diaza-3,5-diborolidine (**1**)

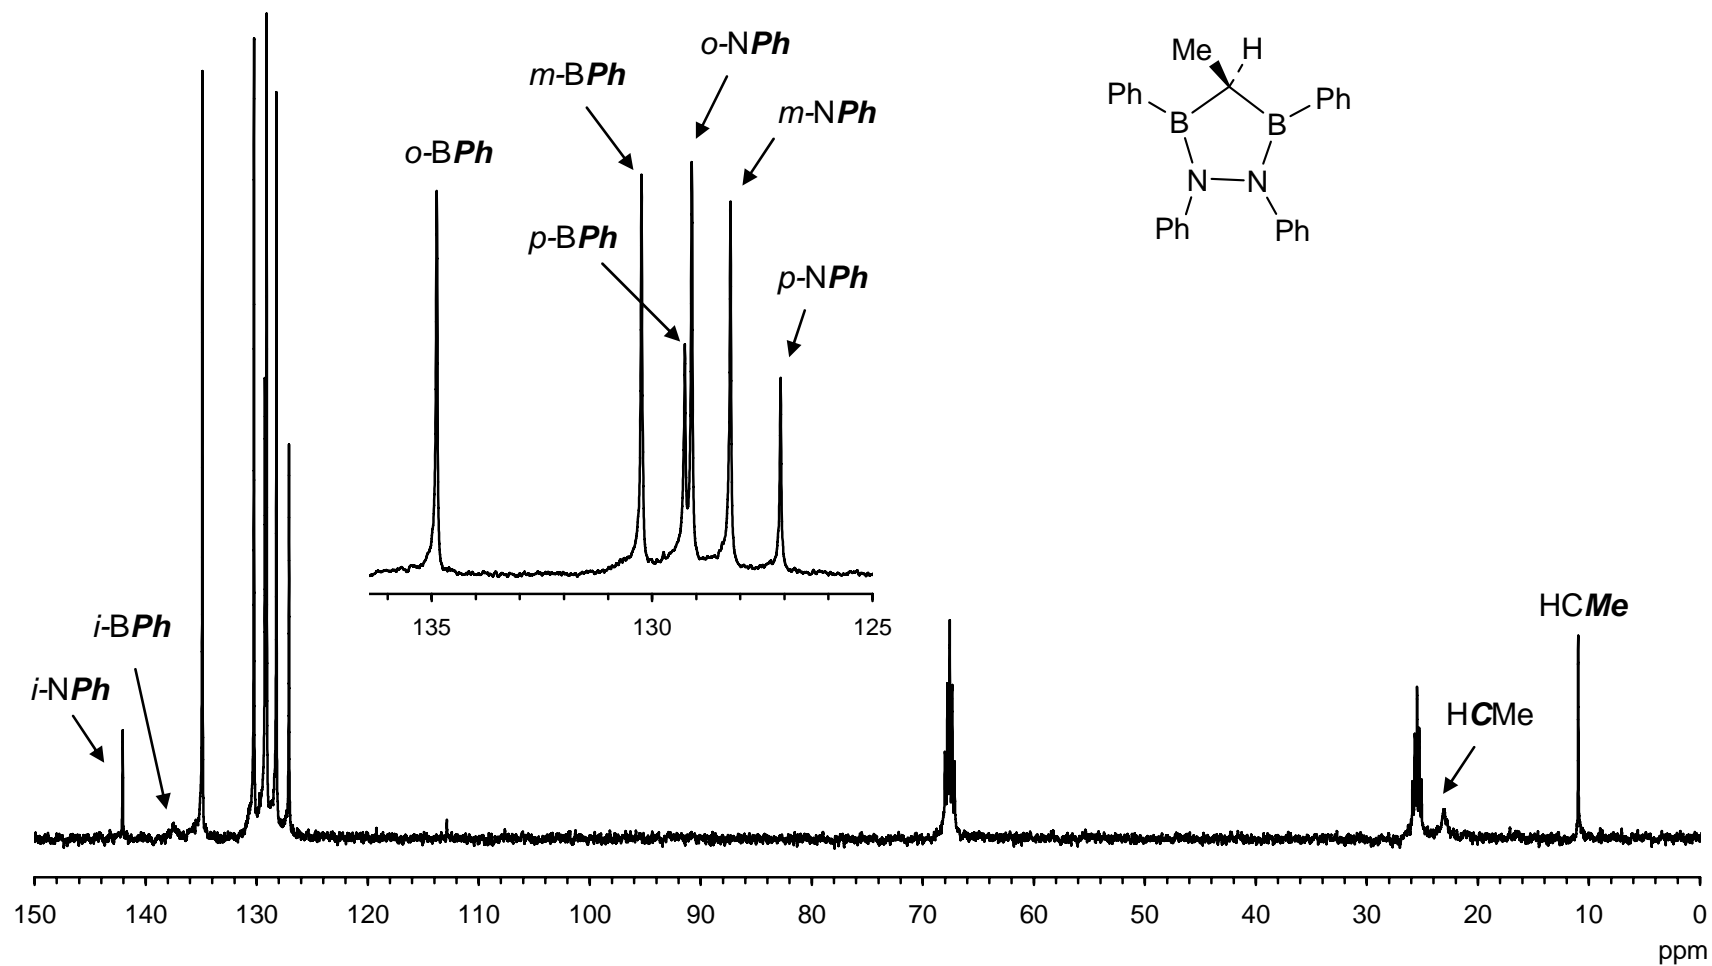

$^1\text{H}$  NMR Spectrum of 1,2-Diphenyl-3,5-dimethylamino-1,2-diaza-3,5-diborolidine (**2**)

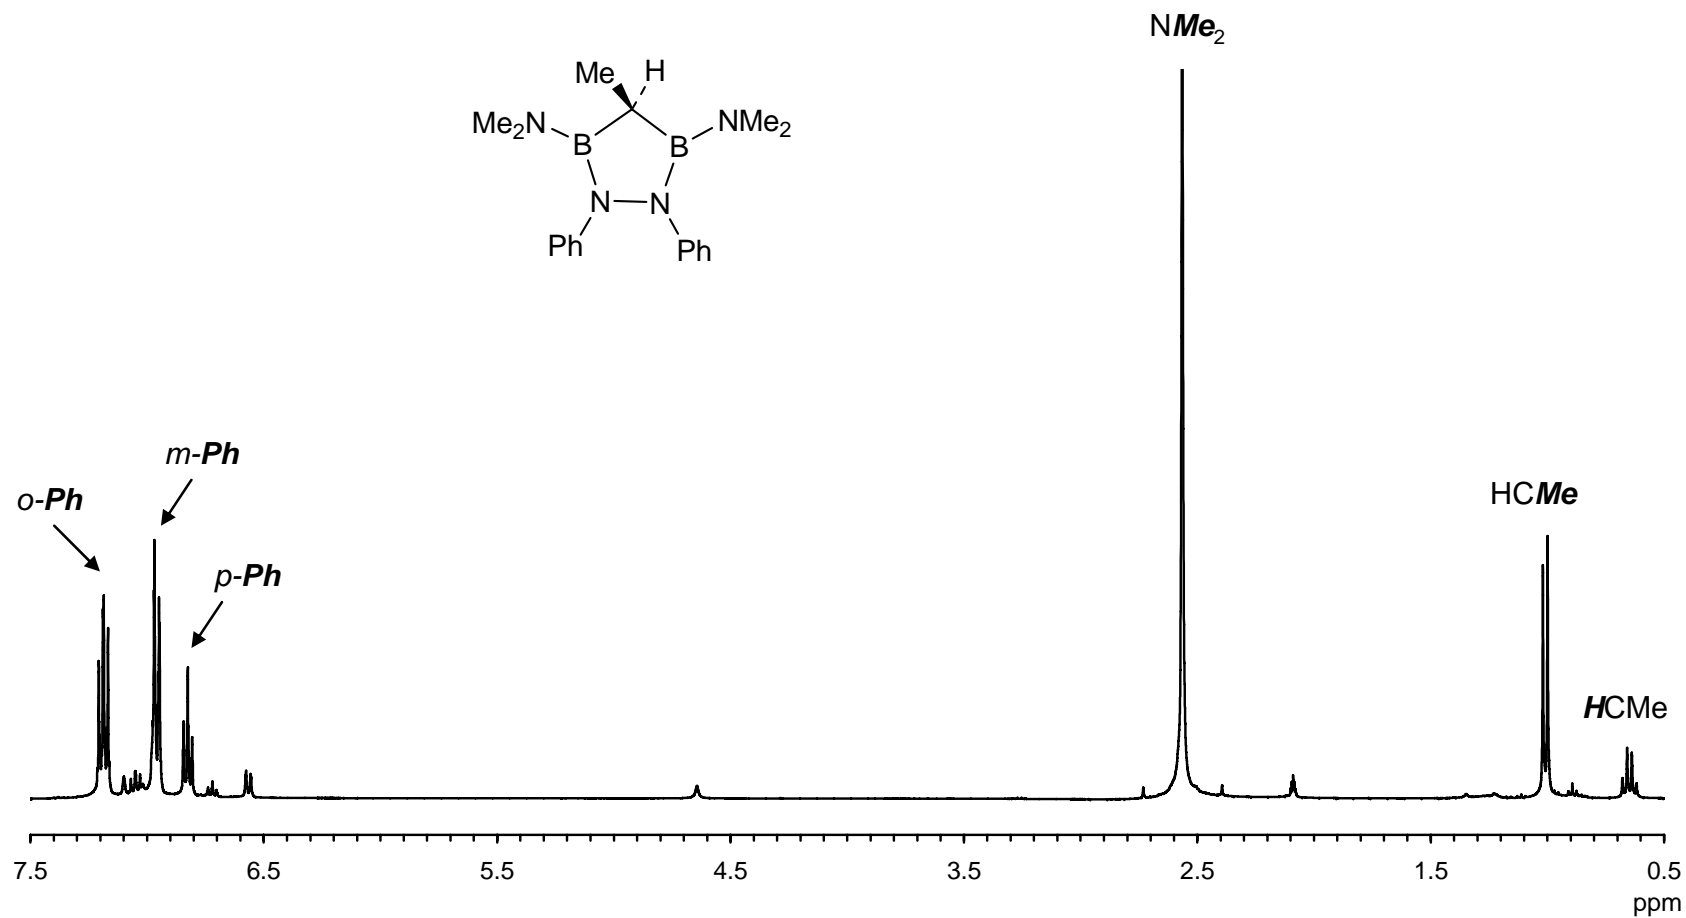

$^{11}\text{B}$  and  $^{13}\text{C}$  NMR Spectra of 1,2-Diphenyl-3,5-dimethylamino-1,2-diaza-3,5-diborolidine (**2**)

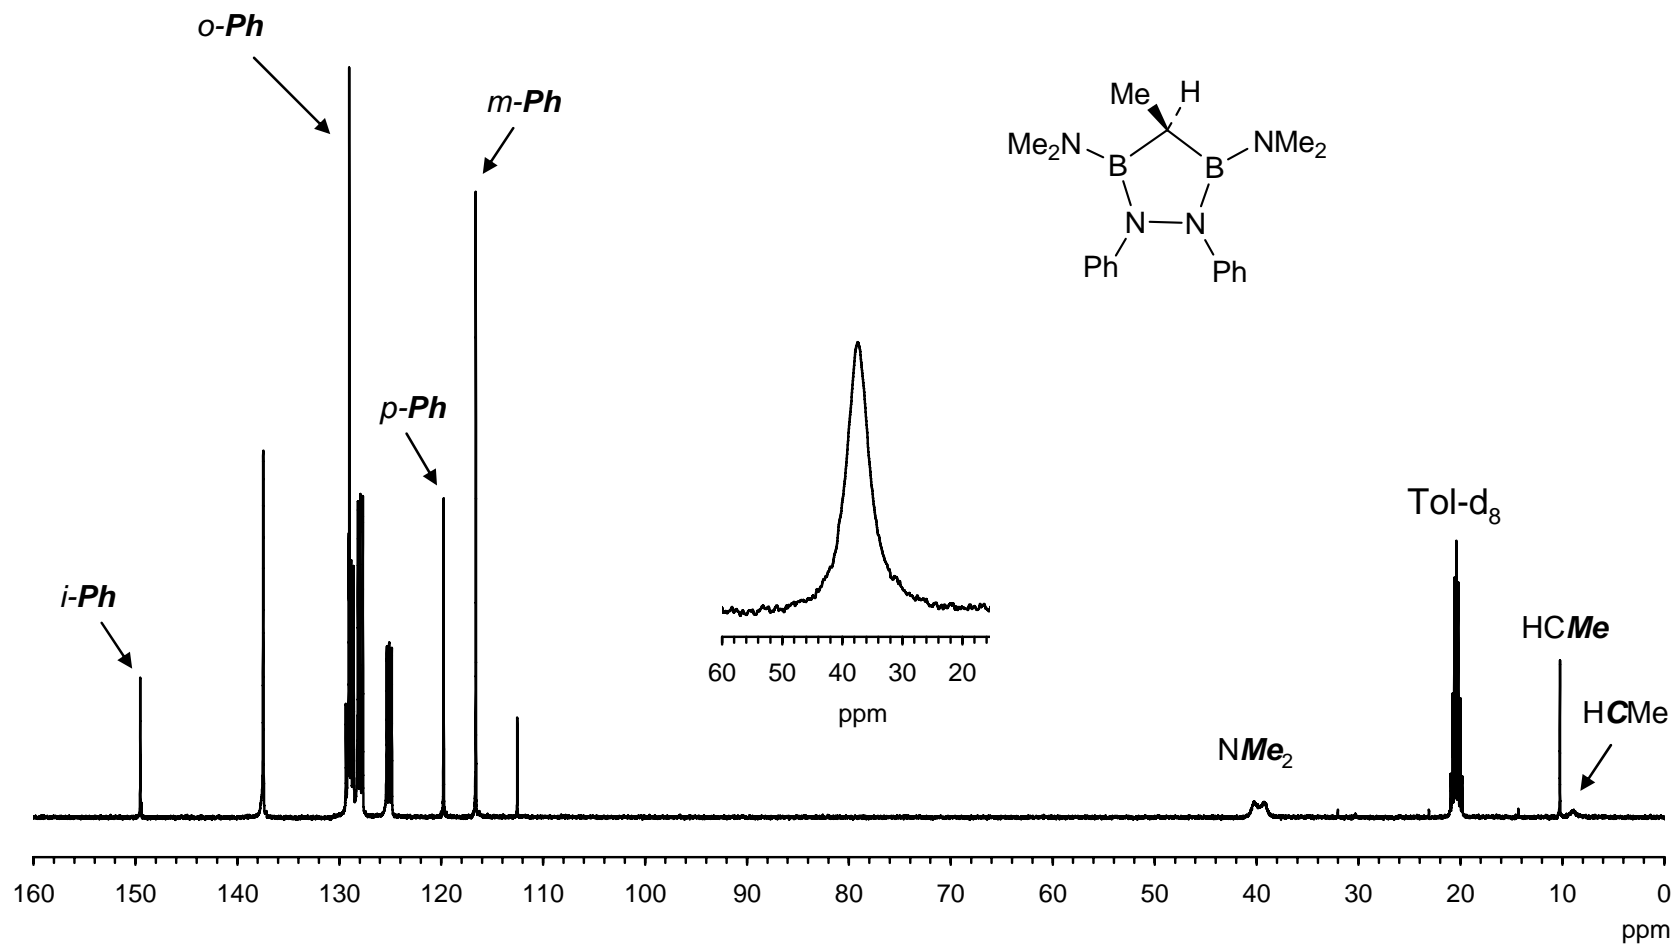

$^1\text{H}$  and  $^7\text{Li}$  NMR Spectra of 1,2,3,5-Tetraphenyl-1,2-diaza-3,5-diborolyllithium (**3a**)

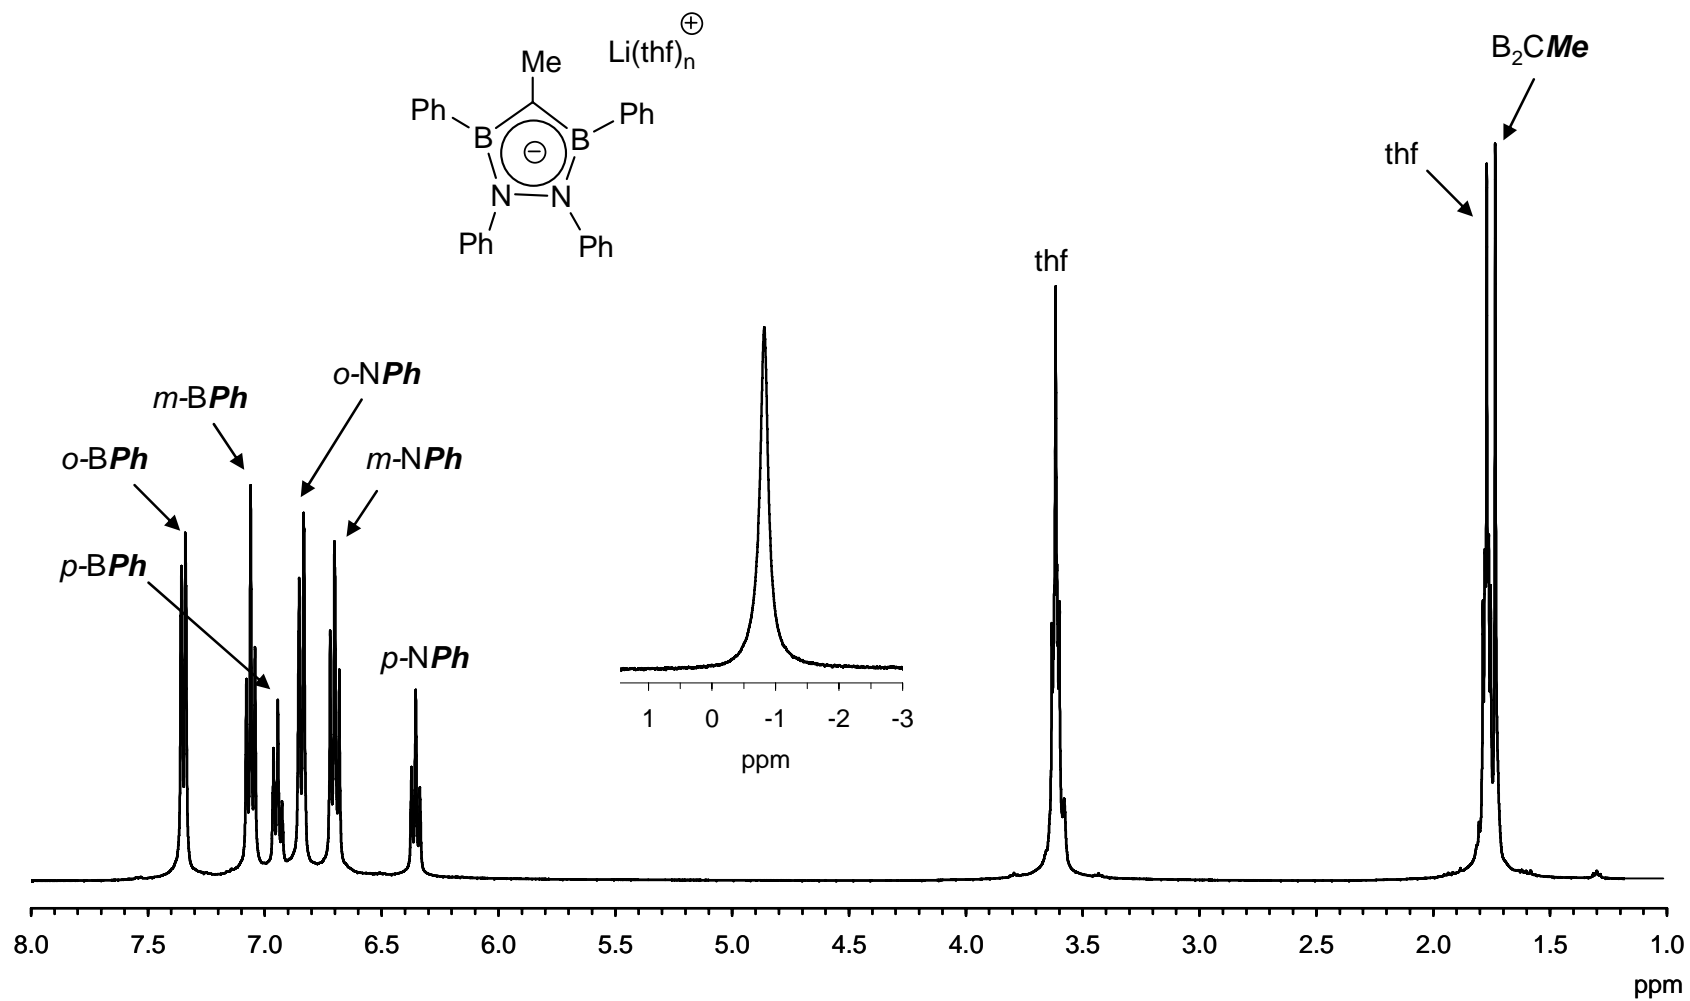

$^{11}\text{B}$  and  $^{13}\text{C}$  NMR Spectra of 1,2,3,5-Tetraphenyl-1,2-diaza-3,5-diborolyllithium (**3a**)

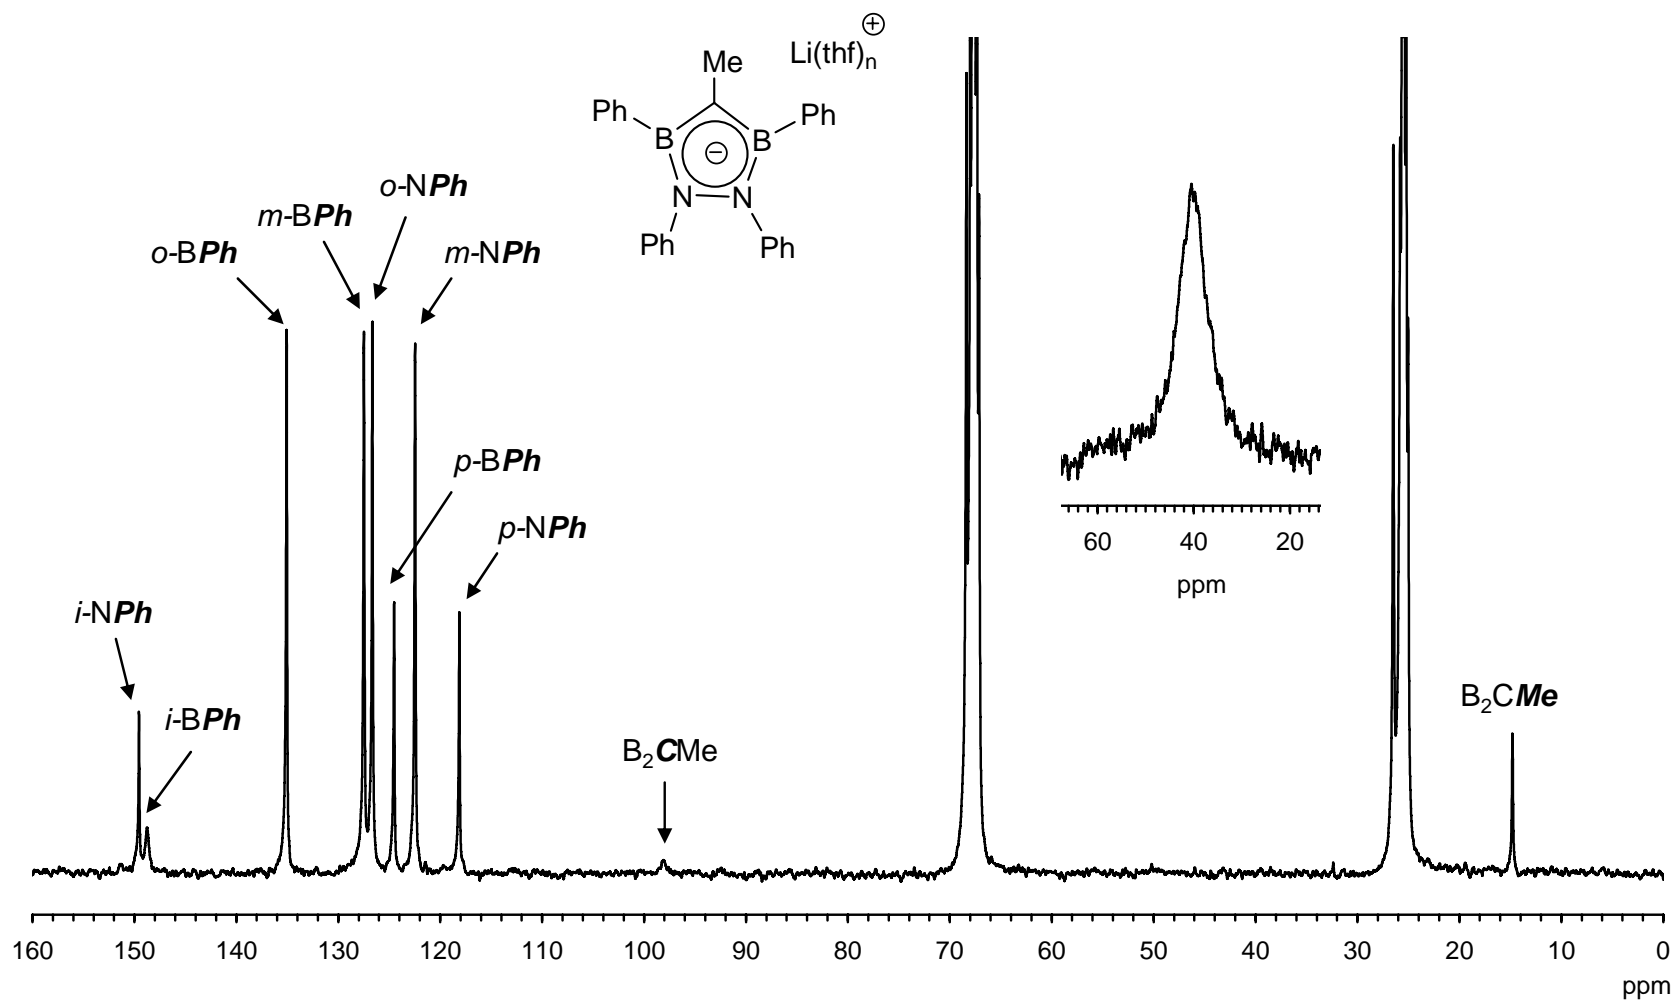

$^1\text{H}$  NMR Spectrum of 1,2,3,5-Tetraphenyl-1,2-diaza-3,5-diborolylium sodium (**3b**)

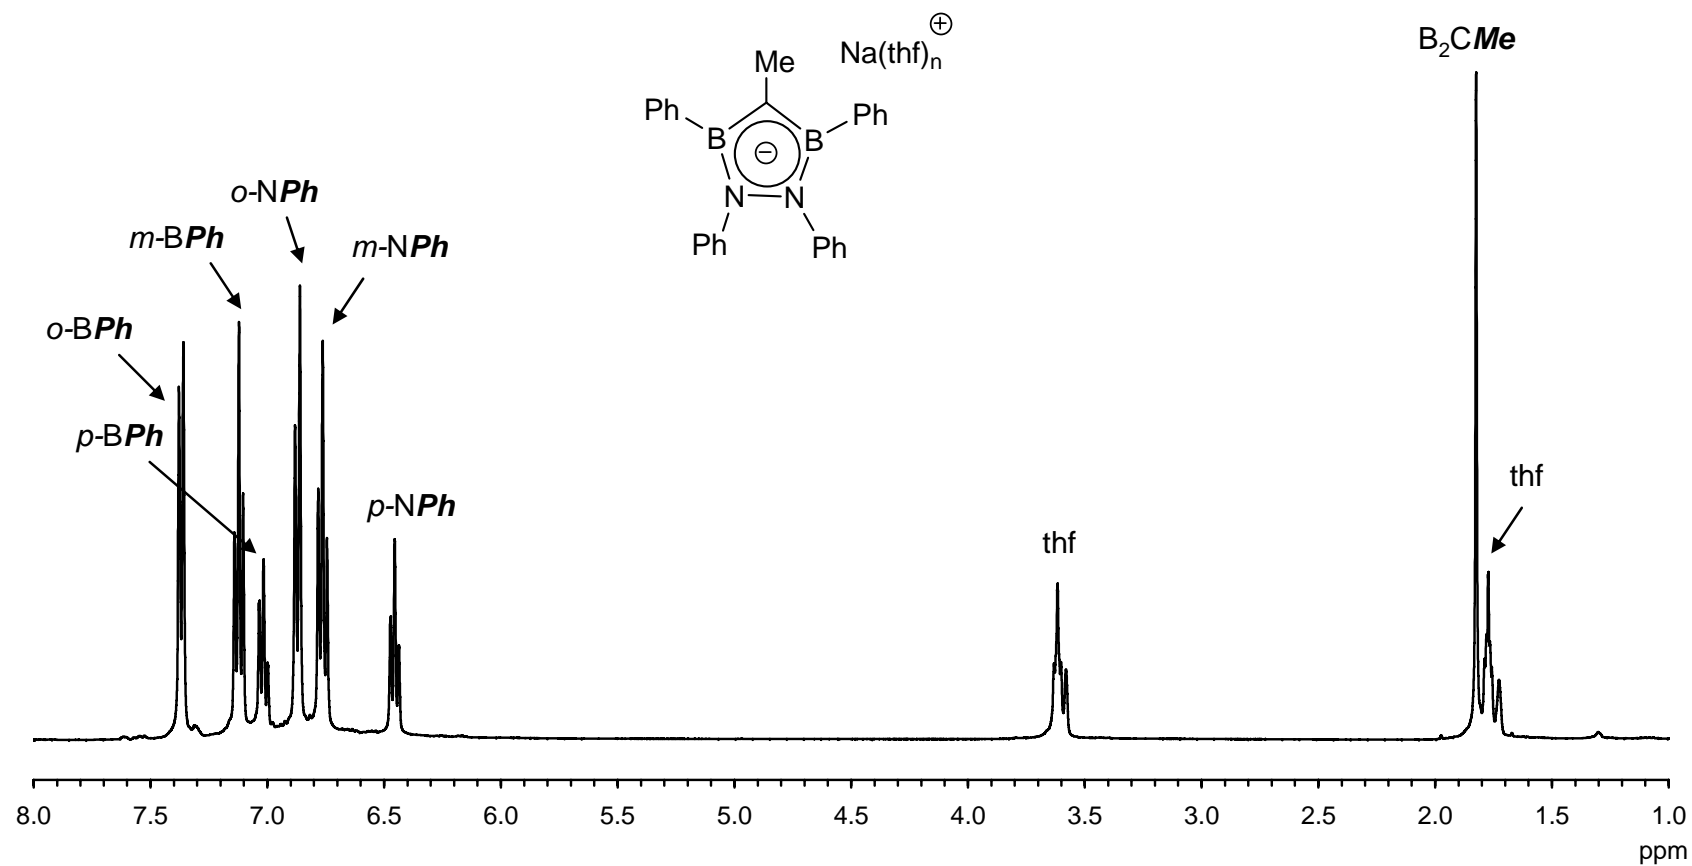



$^{11}\text{B}$  and  $^{13}\text{C}$  NMR Spectra of 1,2,3,5-Tetraphenyl-1,2-diaza-3,5-diborolylium sodium (**3b**)

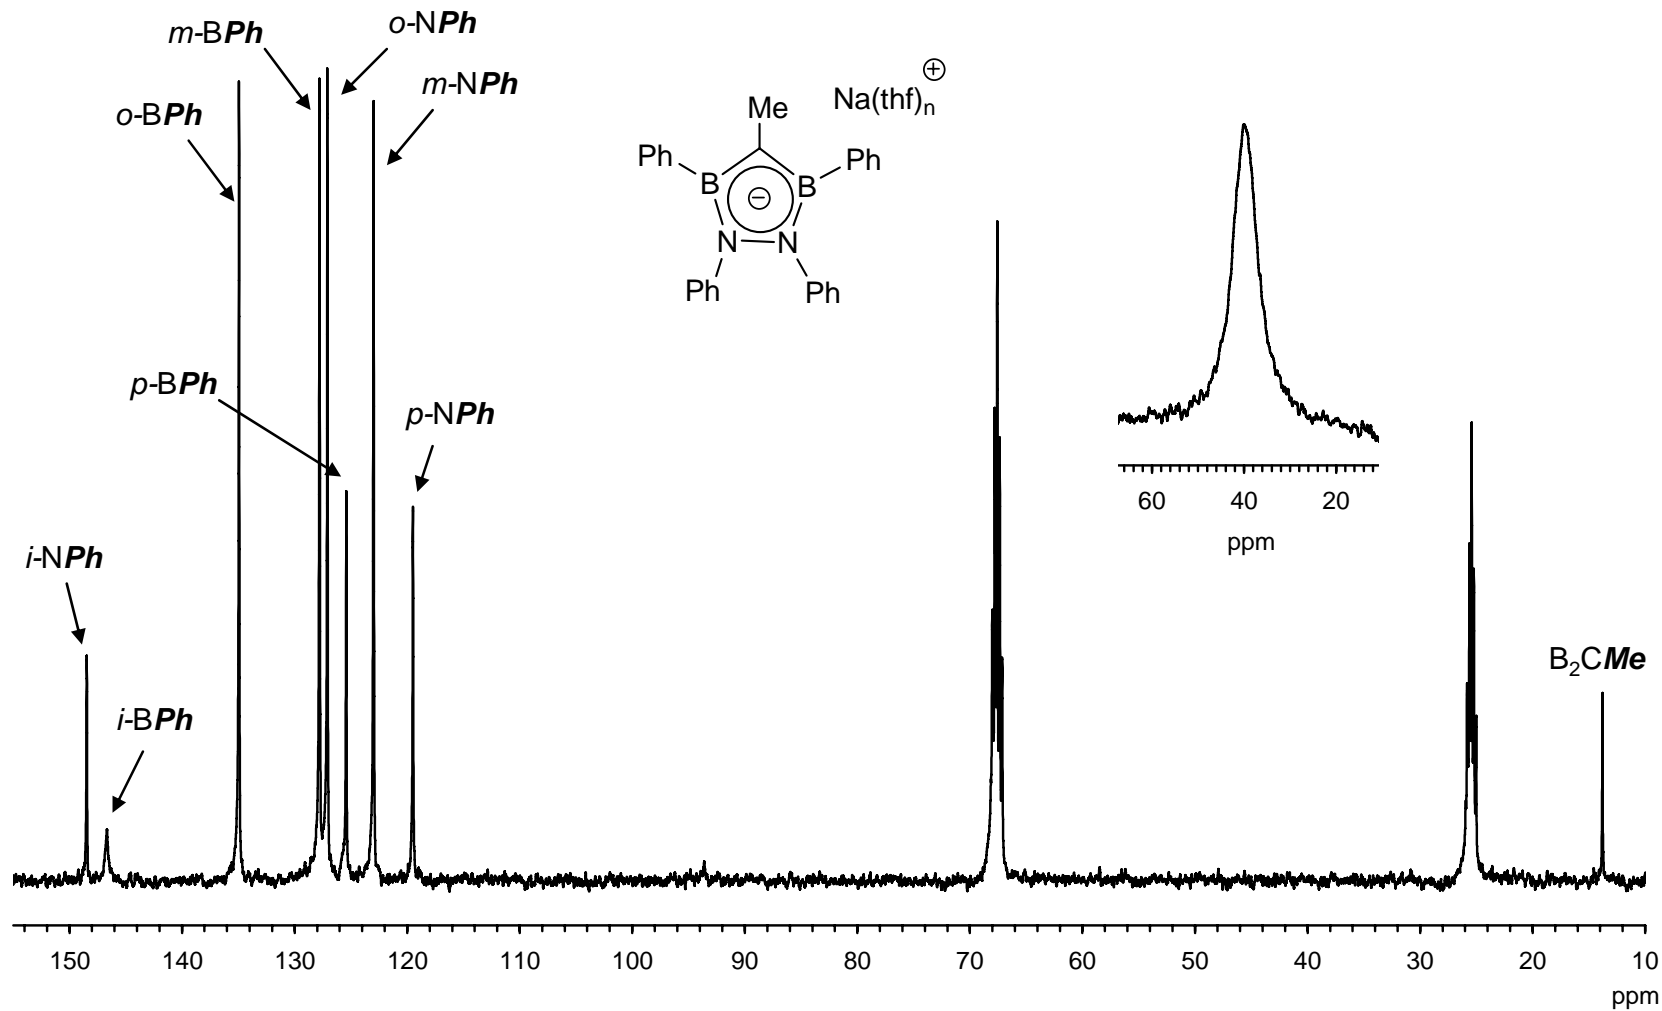

$^1\text{H}$  NMR Spectrum of 1,2,3,5-Tetraphenyl-1,2-diaza-3,5-diborolympotassium (**3c**)

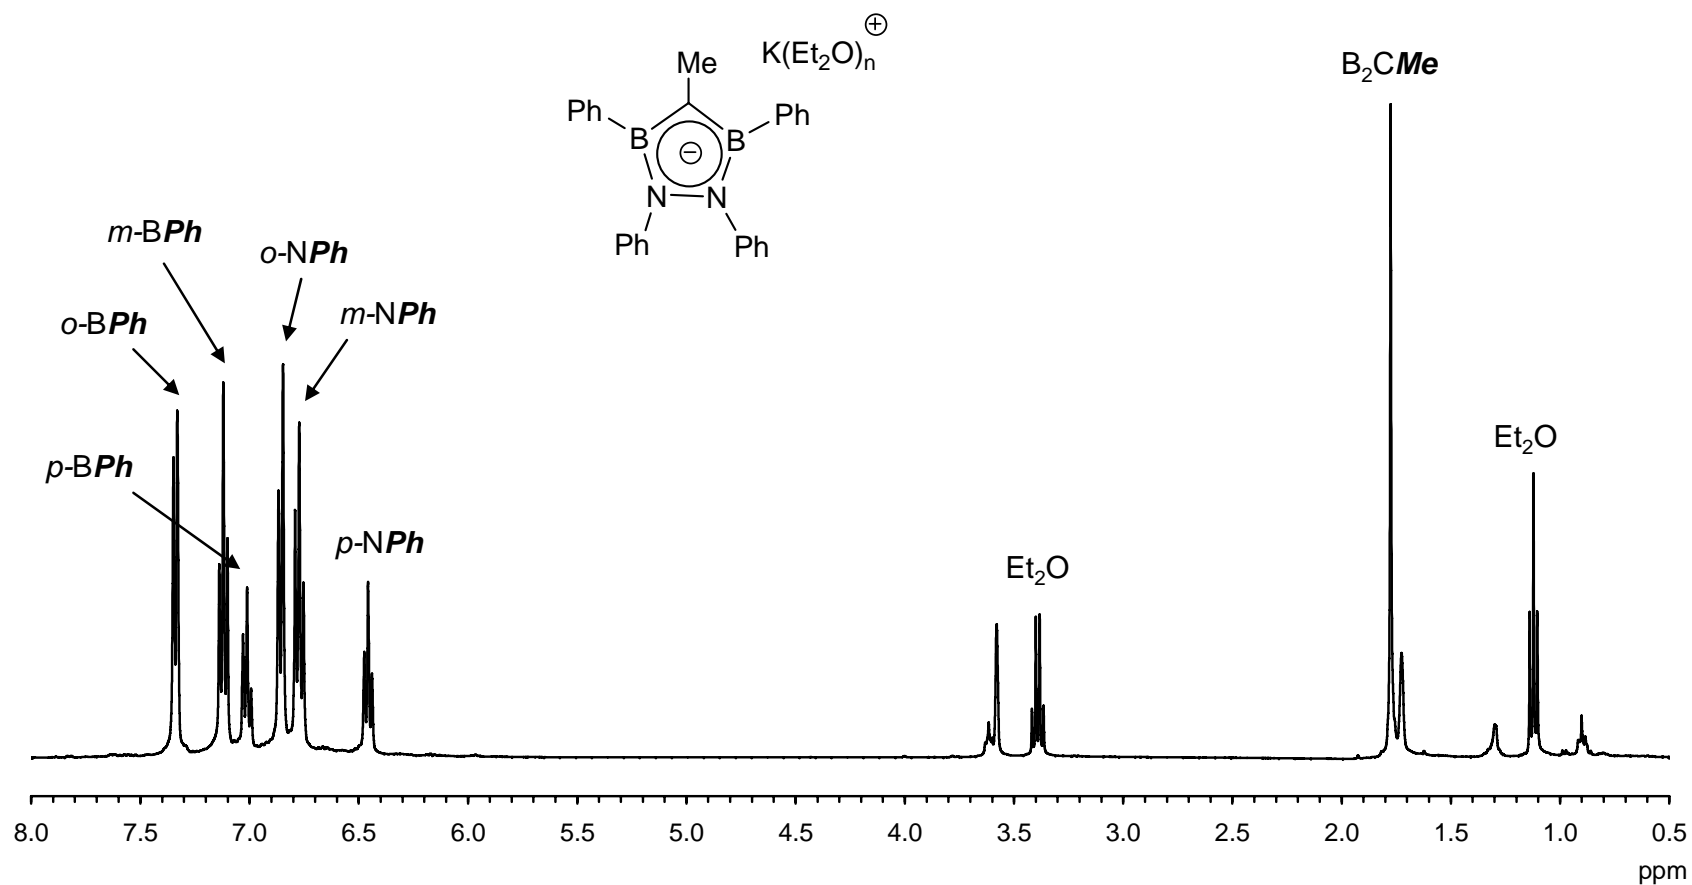

$^{11}\text{B}$  and  $^{13}\text{C}$  NMR Spectra of 1,2,3,5-Tetraphenyl-1,2-diaza-3,5-diborolympotassium (**3c**)

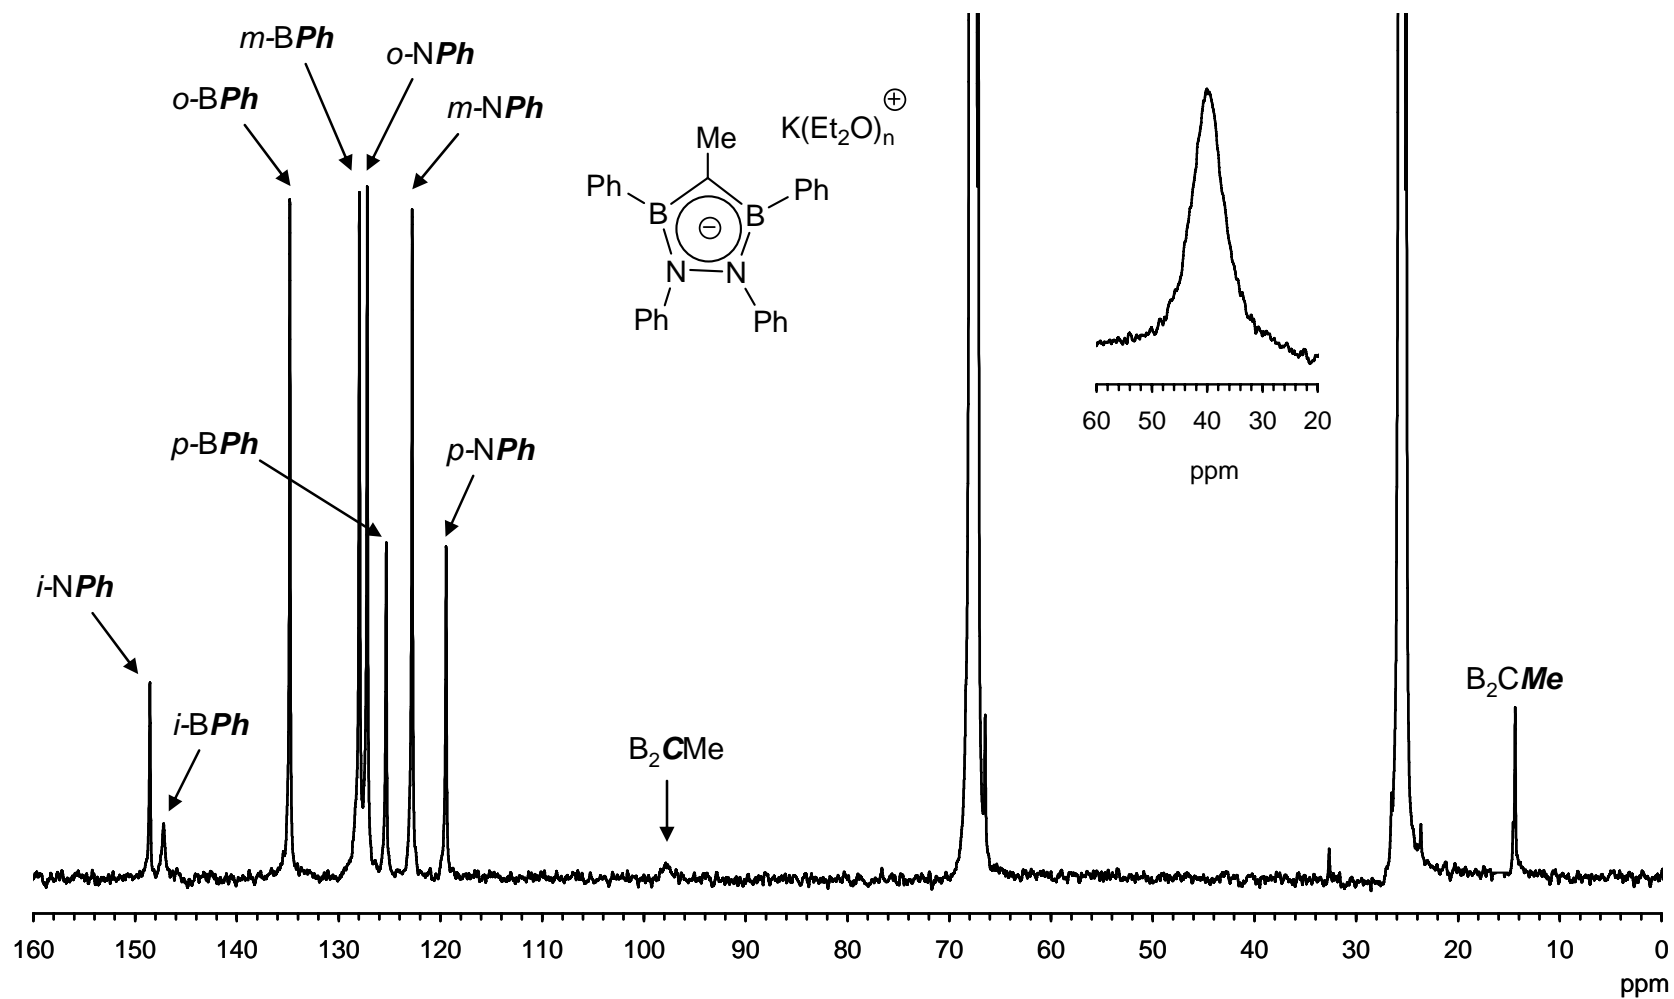

Supplement: b802930j.pdf [file b802930j.pdf]
